# Supplementary material
Source: Springer Nature journal article supplement (https://www.springermedizin.de/resource/supplementary/12961_2010_140_MOESM3_ESM.pdf/9571522)
Supplement: MOESM3 [file 9571522]

## **1. Compilation of a list of potential interventions**

based on

- a. Comprehensive review of interventions reviewed by the Cochrane Collaboration or recommended by the US Preventive Services Task Force or The US Task Force for Community Preventive Services
- b. Ad hoc review of other reviewing agencies, particularly the UK's National Institute for Clinical Excellence, the US Public Health Services, and the scientific literature
- c. Innovative ideas suggested by Committee members

**2. Modification of list based on local needs and prevailing social climate**

**3. On the basis of list, creation of broad groupings of categories which serve as the basis for comprehensive plan**

**4. Refinement of plan by comparing it with existing comprehensive tobacco control plans**
